# Supplementary material for: Parameterizations of US wildfire and prescribed fire emission ratios and emission factors based on FIREX-AQ aircraft measurements
Source: Copernicus journal article supplement (doi:10.5194/acp-24-929-2024), 2024-01-23
Supplement: Supplementary file 1 [file acp-24-929-2024-supplement.zip]

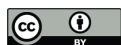

*Supplement of*

## **Parameterizations of US wildfire and prescribed fire emission ratios and emission factors based on FIREX-AQ aircraft measurements**

**Georgios I. Gkatzelis et al.**

*Correspondence to:* Georgios I. Gkatzelis (g.gkatzelis@juelich.de) and Matthew M. Coggon (matthew.m.coggon@noaa.gov)

- acp-24-929-2024-supplement-title-page.pdf
- 2023\_FIREX AQ\_ACP\_Supplement - Applied Changes - Typeset.docx
- Table S1 FIREX-AQ Emissions.xlsx

The copyright of individual parts of the supplement might differ from the article licence.
